# Supplementary material
Source: PubMed Central journal article supplement (PMC5496793)
Supplement: NIHMS840720-supplement-01.pdf [file NIHMS840720-supplement-01.pdf]

Supplementary Table 1 - Differences in Semmes-Weinstein Monofilament Testing in the Dominant Lower and Upper Extremity Sites Between Cancer Survivors With (n=426) and Without (n=197) Chemotherapy Induced Neuropathy (CIN)

| Site                                    | No CIN<br>31.6% (n=197) | CIN<br>68.4% (n=426) | p-value <sup>a</sup> | No CIN |     | CIN  |     |
|-----------------------------------------|-------------------------|----------------------|----------------------|--------|-----|------|-----|
|                                         | Monofilament size       | Monofilament size    |                      | A      | B   | A    | B   |
|                                         | Mean (SD)               | Mean (SD)            |                      |        |     |      |     |
| Lower Extremity Sites – Plantar Surface |                         |                      |                      |        |     |      |     |
| Pad of great toe                        | 4.41 (0.39)             | 4.68 (0.70)          | <.001                | 2.1    | 0.5 | 6.8  | 3.1 |
| Pad of 3 <sup>rd</sup> toe              | 4.43 (0.45)             | 4.67 (0.72)          | <.001                | 3.1    | 0.5 | 6.7  | 3.8 |
| Pad of 5 <sup>th</sup> toe              | 4.40 (0.36)             | 4.59 (0.60)          | <.001                | 1.5    | 0.5 | 4.5  | 2.1 |
| Plantar great toe MP joint+             | 4.43 (0.43)             | 4.67 (0.70)          | <.001                | 3.3    | 0.0 | 8.0  | 2.2 |
| Plantar 3 <sup>rd</sup> toe MP joint+   | 4.45 (0.35)             | 4.87 (0.85)          | <.001                | 1.6    | 0.0 | 14.1 | 2.8 |
| Plantar 5 <sup>th</sup> toe MP joint+   | 4.45 (0.39)             | 4.72 (0.73)          | <.001                | 2.2    | 0.0 | 8.0  | 3.1 |
| Plantar medial arch+                    | 4.39 (0.35)             | 4.51 (0.54)          | <.001                | 1.6    | 0.5 | 4.3  | 0.9 |
| Base of heel                            | 4.52 (0.45)             | 4.93 (0.82)          | <.001                | 3.1    | 0.0 | 13.1 | 3.6 |
| Lower Extremity Sites – Dorsal Surface  |                         |                      |                      |        |     |      |     |
| MP joint of great toe                   | 4.34 (0.18)             | 4.49 (0.51)          | <.001                | 0.0    | 0.5 | 3.1  | 1.7 |
| MP joint of 3 <sup>rd</sup> toe         | 4.33 (0.18)             | 4.43 (0.46)          | <.001                | 0.0    | 0.5 | 1.9  | 1.9 |
| MP joint of 5th toe                     | 4.35 (0.25)             | 4.43 (0.45)          | <.001                | 0.5    | 0.5 | 1.7  | 1.9 |
| Dorsum medial navicular+                | 4.36 (0.26)             | 4.45 (0.41)          | <.001                | 1.1    | 0.0 | 2.1  | 0.6 |
| Midway along tibia                      | 4.39 (0.27)             | 4.57 (0.49)          | <.001                | 0.5    | 0.5 | 2.8  | 1.4 |
| Patella                                 | 4.33 (0.18)             | 4.39 (0.29)          | <.001                | 0.0    | 0.5 | 0.7  | 0.5 |

| Upper Extremity Sites – Palmar Surface |             |             |       |     |     |     |     |
|----------------------------------------|-------------|-------------|-------|-----|-----|-----|-----|
| Pad of thumb                           | 3.72 (0.26) | 3.86 (0.44) | <.001 | 0.0 | 0.0 | 0.5 | 0.5 |
| Thumb webspace                         | 3.65 (0.17) | 3.77 (0.38) | <.001 | 0.0 | 0.0 | 0.0 | 0.7 |
| Tip of index finger                    | 3.69 (0.23) | 3.81 (0.42) | <.001 | 0.0 | 0.0 | 0.2 | 0.7 |
| Tip of little finger                   | 3.65 (0.16) | 3.72 (0.39) | .019  | 0.0 | 0.0 | 0.5 | 0.7 |
| Midway base of palm                    | 3.65 (0.17) | 3.76 (0.36) | <.001 | 0.0 | 0.0 | 0.2 | 0.2 |
| One third up anterior arm              | 3.70 (0.24) | 3.85 (0.41) | <.001 | 0.0 | 0.0 | 0.2 | 0.5 |
| Two thirds up anterior arm             | 3.70 (0.24) | 3.90 (0.42) | <.001 | 0.0 | 0.0 | 0.0 | 0.7 |

<sup>a</sup>Mann Whitney U test

+Completed on 512 of 623 cancer survivors

Abbreviations: A = Percentage of cancer survivors with or without CIN who felt only the 6.65 monofilament, B = Percentage of cancer survivors with or without CIN who did not feel the 6.65 monofilament, MP = metacarpophalangeal, SD = standard deviation
